# Supplementary material for: Exfoliation and supramolecular functionalization of graphene with an electron donor perylenediimide derivative
Source: Royal Society of Chemistry journal article supplement (doi:10.1039/c6pp00351f), 2017-01-16
Supplement: c6pp00351f1.pdf [file c6pp00351f1.pdf]

## Exfoliation and supramolecular functionalization of graphene with an electron donor perylenediimide derivative

Luis Martín-Gomis,<sup>a</sup> Nikos. Karousis,<sup>b</sup> Fernando Fernández-Lázaro,<sup>a</sup> Ioannis D. Petsalakis,<sup>b</sup> Kei Ohkubo,<sup>c,d</sup> Shunichi Fukuzumi,<sup>c,d,e</sup> Nikos Tagmatarchis<sup>b\*</sup> and Ángela Sastre-Santos<sup>a\*</sup>

<sup>a</sup> Área de Química Orgánica Instituto de Bioingeniería, Universidad Miguel Hernández, Elche, Spain. E-mail: [asastre@umh.es](mailto:asastre@umh.es).

<sup>b</sup> Theoretical and Physical Chemistry Institute, National Hellenic Research Foundation, 48 Vassileos Constantinou Avenue, Athens 116 35, Greece. E-mail: [tagmatar@iee.gr](mailto:tagmatar@iee.gr).

<sup>c</sup> Department of Material and Life Science, Graduate School of Engineering, Osaka University, ALCA, Japan Science and Technology Agency (JST), Suita, Osaka 565-0871, Japan. E-mail: [fukuzumi@chem.eng.osaka-u.ac.jp](mailto:fukuzumi@chem.eng.osaka-u.ac.jp)

<sup>d</sup> Department of Bioinspired Science, Ewha Womans University, Seoul, 120-750, Korea

<sup>e</sup> Faculty of Science and Engineering, Meijo University, ALCA, SENTAN, Japan Science and Technology Agency (JST), Nagoya, Aichi, Japan

### Contents

|                                                                                          |   |
|------------------------------------------------------------------------------------------|---|
| <b>Figure S1:</b> <sup>1</sup> H NMR spectrum of Pip-PDI in CDCl <sub>3</sub> .....      | 2 |
| <b>Figure S2:</b> <sup>13</sup> C NMR spectrum of Pip-PDI in CDCl <sub>3</sub> .....     | 3 |
| <b>Figure S3:</b> HR-MALDI-TOF of Pip-PDI.....                                           | 4 |
| <b>Figure S4:</b> COSY spectrum of Pip-PDI.....                                          | 5 |
| <b>Figure S5:</b> <sup>1</sup> H-NMR titration assays of Pip-PDI with TFA and DABCO..... | 6 |
| <b>Figure S6:</b> Femtosecond flash photolysis of the Pip-PDI/ graphene hybrid.....      | 7 |

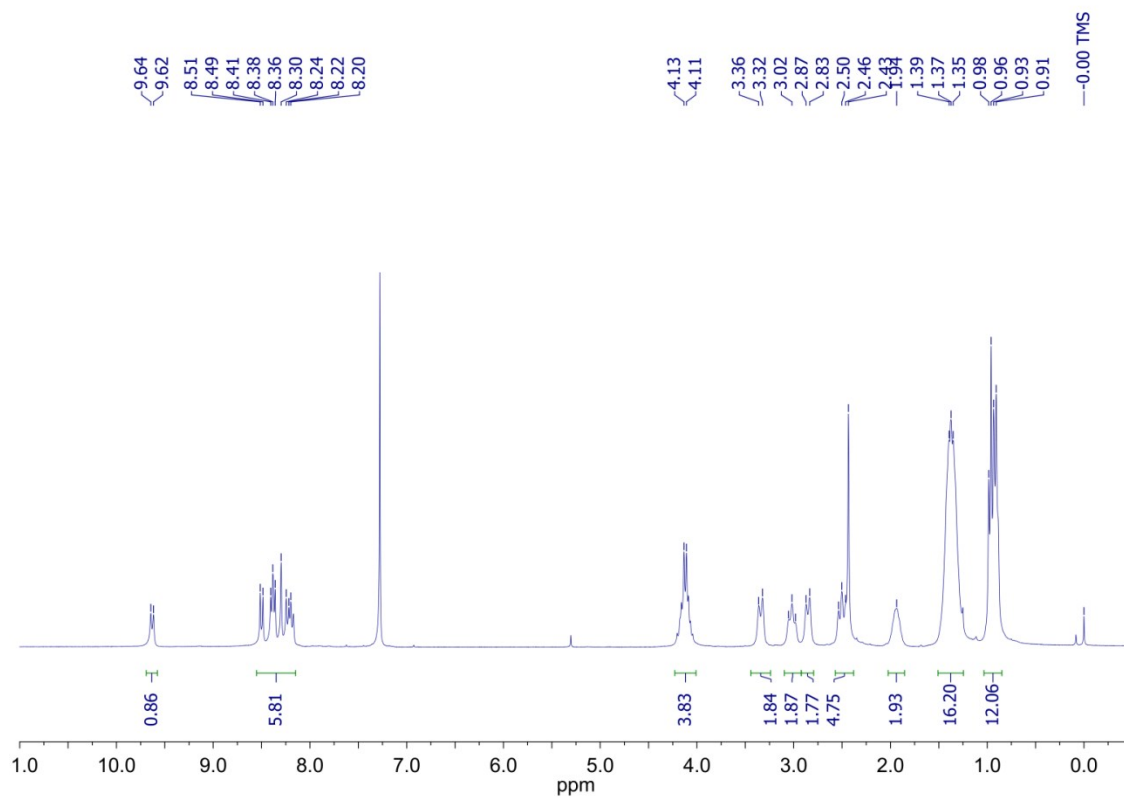

**Figure S1:**  $^1\text{H}$  NMR spectrum of **Pip-PDI** in  $\text{CDCl}_3$ .

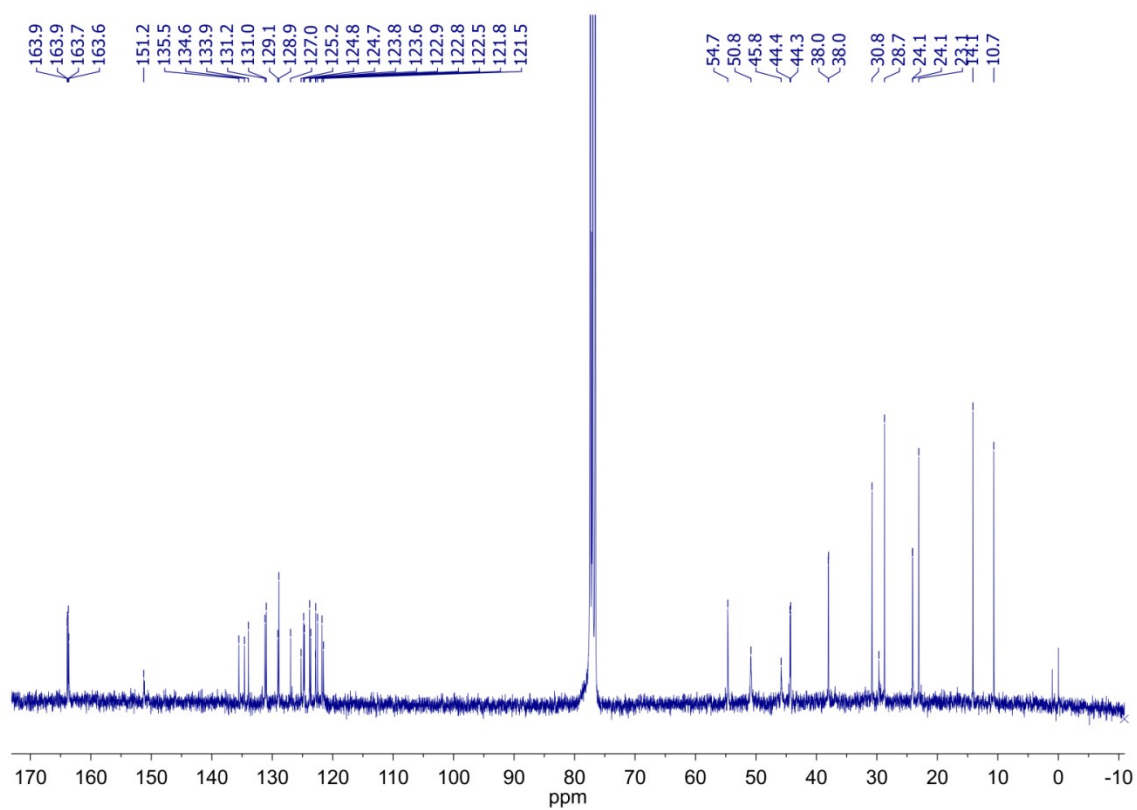

**Figure S2:** <sup>13</sup>C NMR spectrum of Pip-PDI in CDCl<sub>3</sub>.

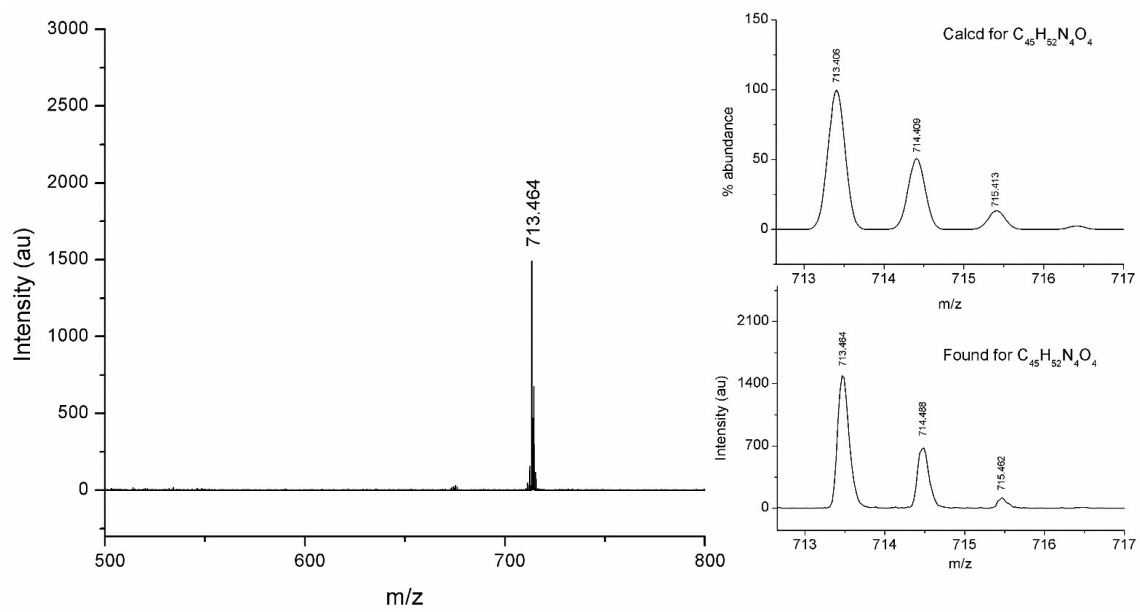

**Figure S3:** HR-MALDI-TOF of Pip-PDI.

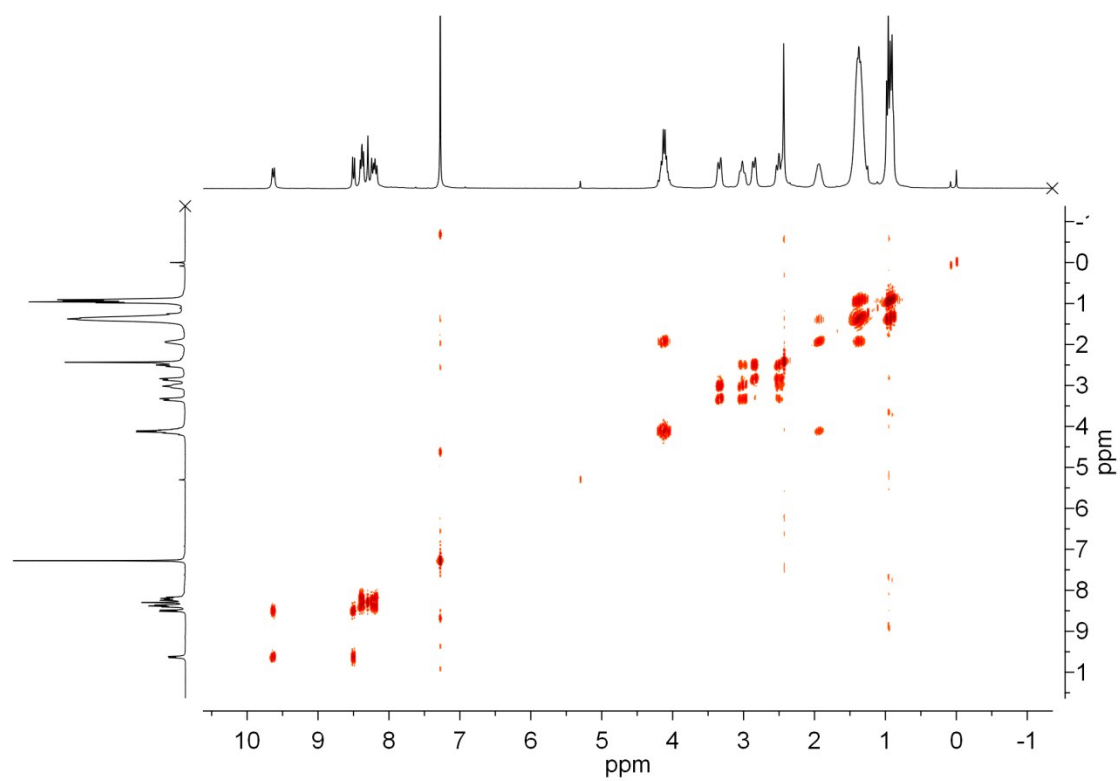

**Figure S4:** COSY spectrum of **Pip-PDI**.

## NMR titration assays

The NMR titration of Pip-PDI with  $\text{CF}_3\text{CO}_2\text{H}$  was performed as follows. An initial volume of 500  $\mu\text{L}$  of a 1.03 mM  $\text{CDCl}_3$  solution of Pip-PDI was placed in a  $^1\text{H}$ -NMR tube. Aliquots of a  $\text{CDCl}_3$  solution containing  $\text{CF}_3\text{CO}_2\text{H}$  (15.68 mM) and Pip-PDI (1.03 mM) were subsequently added and a spectrum was recorded after each addition. Pip-PDI was added in order to obviate the need to account for dilution effects during the titrations. Once the titration was finished, enough 1,4-diazabicyclo[2.2.2]octane (DABCO) was added to the NMR tube to neutralize  $\text{CF}_3\text{CO}_2\text{H}$ , taking care to use a 1.03 mM  $\text{CDCl}_3$  Pip-PDI solution as carrier, in order to obviate the need to account for dilution effects

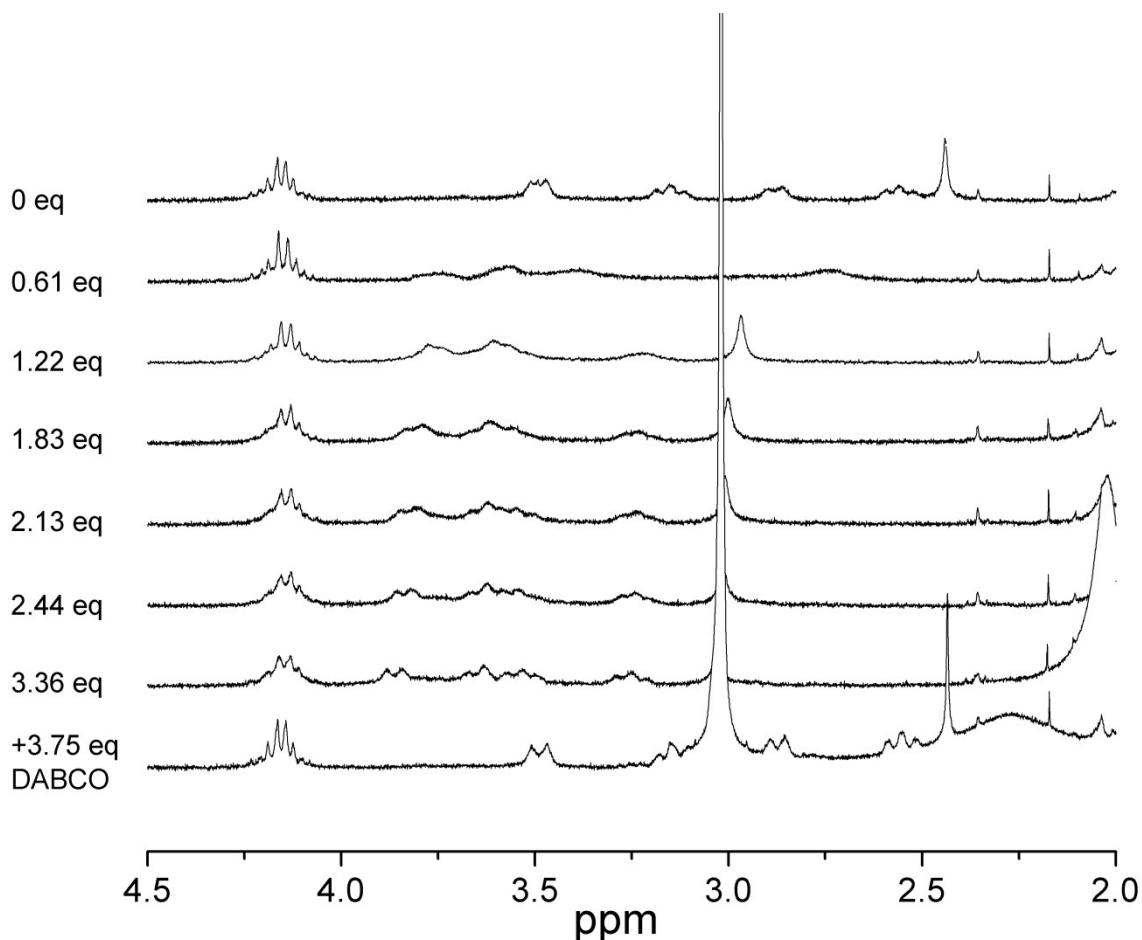

**Figure S5:**  $^1\text{H}$ -NMR titration assays of **Pip-PDI** with TFA and DABCO.

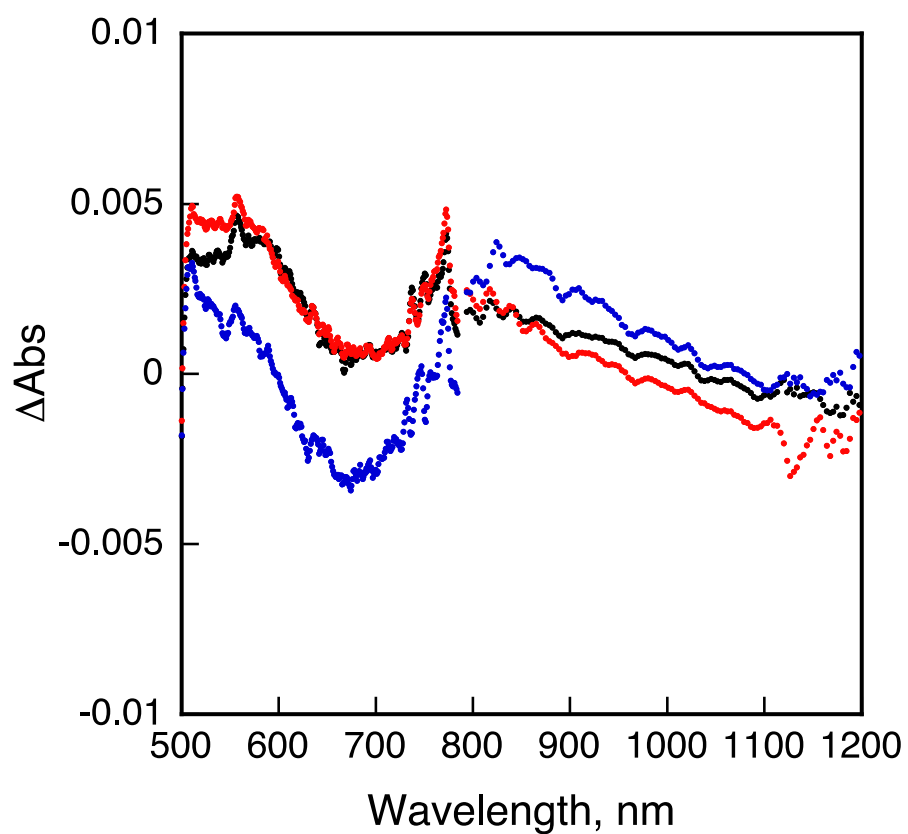

**Figure S6:** Femtosecond flash photolysis of the Pip-PDI/ graphene hybrid.
